# Supplementary material for: A hydrothermal reaction of an aqueous solution of BSA yields highly fluorescent N doped C-dots used for imaging of live mammalian cells
Source: Royal Society of Chemistry journal article supplement (doi:10.1039/c6tb00519e), 2016-01-01
Supplement: c6tb00519e1.pdf [file c6tb00519e1.pdf]

## Supporting information

### **A hydrothermal reaction of an aqueous solution of BSA yields highly fluorescent N doped C-dots used for imaging of live mammalian cells.**

**Vijay Bhooshan Kumar<sup>a</sup>, Yoni Sheinberger<sup>b</sup>, Zeev Porat<sup>c,d</sup>, Yaron Shav-Tal<sup>b\*</sup>, Aharon Gedanken<sup>a, e\*</sup>**

<sup>a</sup>Department of Chemistry and Bar-Ilan Institute for Nanotechnology & Advanced Materials, Bar Ilan University, Ramat-Gan 52900, Israel

<sup>b</sup>Mina and Everard Goodman Faculty of Life Sciences & Institute of Nanotechnology, Bar-Ilan University, Ramat Gan, 52900 Israel.

<sup>c</sup>Division of Chemistry, Nuclear Research Center-Negev, P.O.Box 9001, Be'er-Sheva 84190, Israel.

<sup>d</sup>Institutes of Applied Research, Ben-Gurion University of the Negev, Be'er-Sheva 841051, Israel.

<sup>e</sup>National Cheng Kung University, Department of Materials Science & Engineering, Tainan 70101, Taiwan

\*Corresponding author email: [Yaron.Shav-Tal@biu.ac.il](mailto:Yaron.Shav-Tal@biu.ac.il), [gedanken@mail.biu.ac.il](mailto:gedanken@mail.biu.ac.il)

Fax: 972-3-7384053; Tel: 972-3-5318315

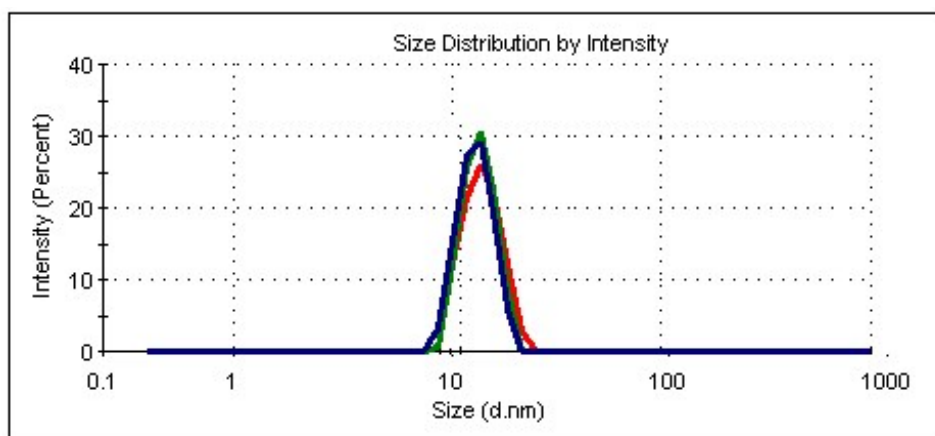

**Figure S1:** Plots of three consecutive measurements of DLS of N@C-dots sample after hydrothermal reaction.

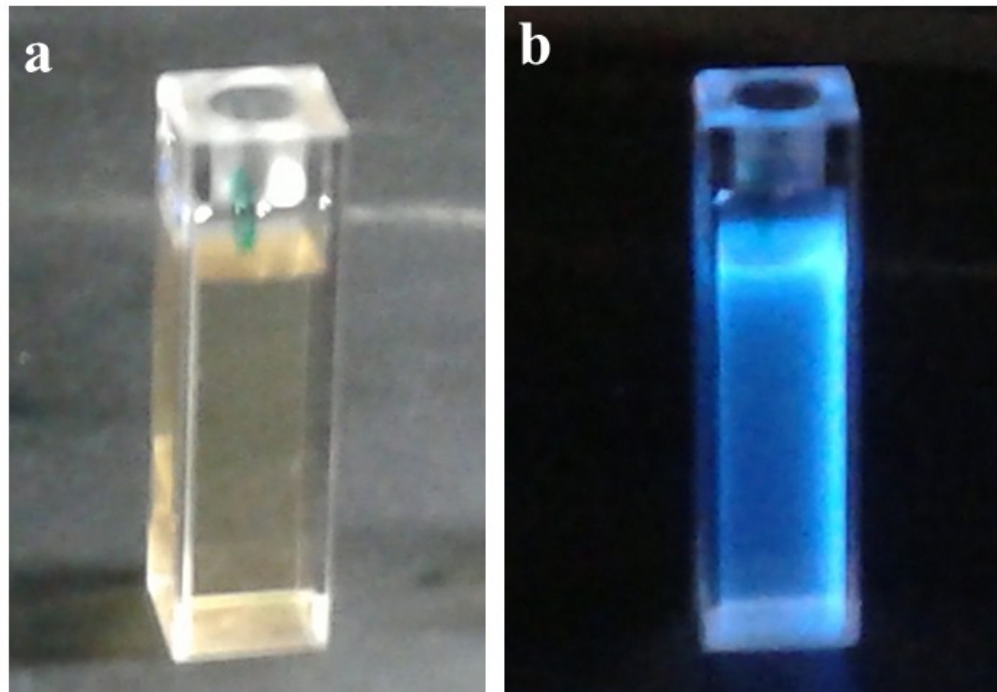

**Figure S2:** Photographs of a suspension of the C-dots illuminated by (A) UV light (365 nm) and (B) daylight.

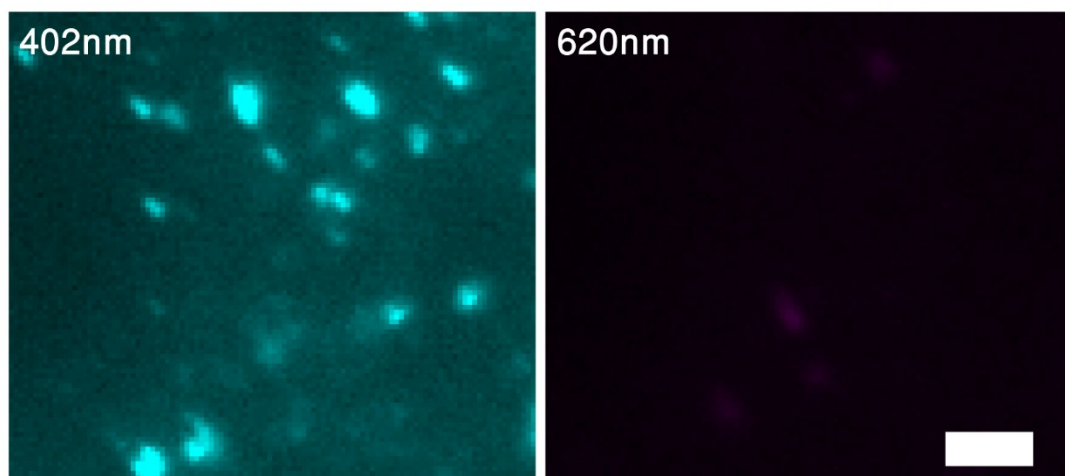

**Figure: S3.** Optical fluorescence images of C-dots on glass slide. Scale bar= 3  $\mu\text{m}$ .

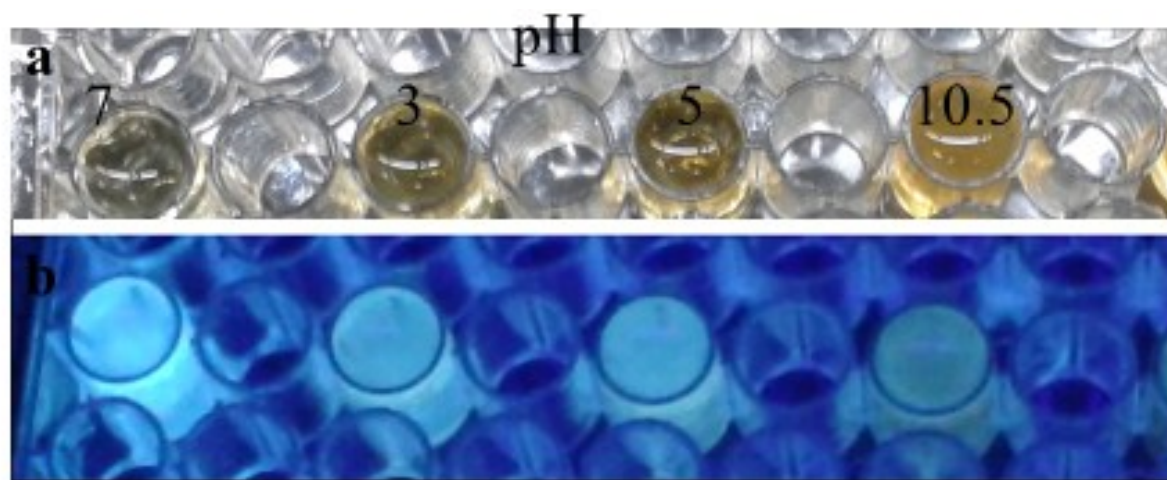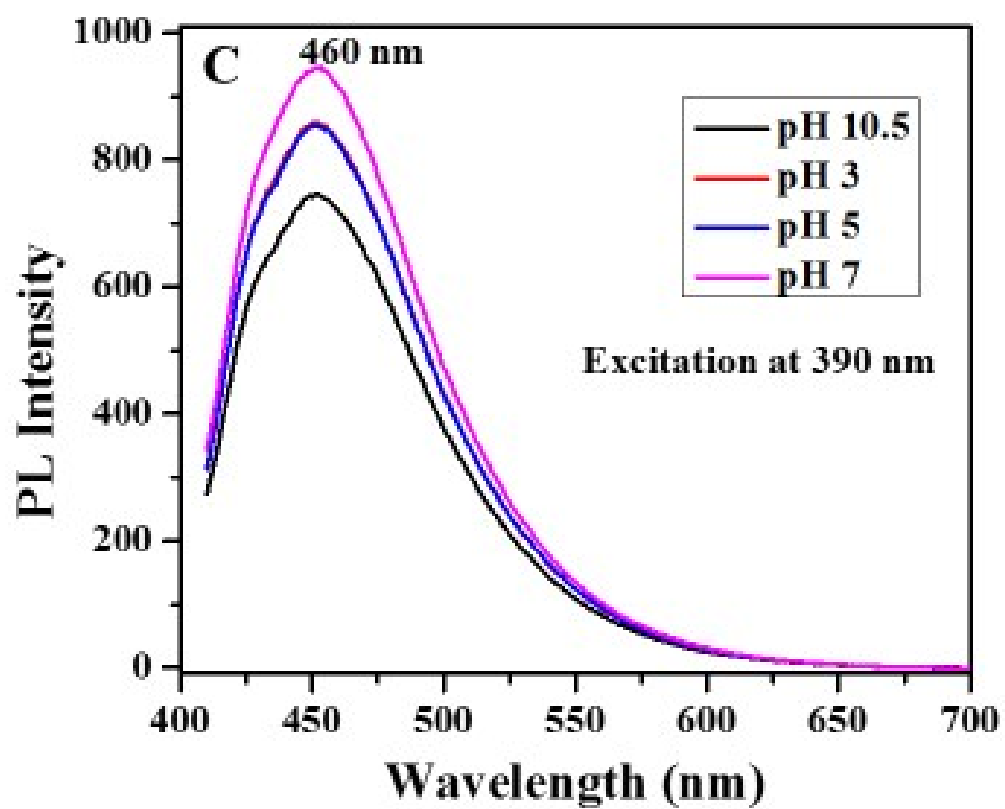

**Figure: S4.** Fluorescent images of N@C-dots at different pH: A) daylight, (B) UV light (365 nm), and (c) PL spectra.

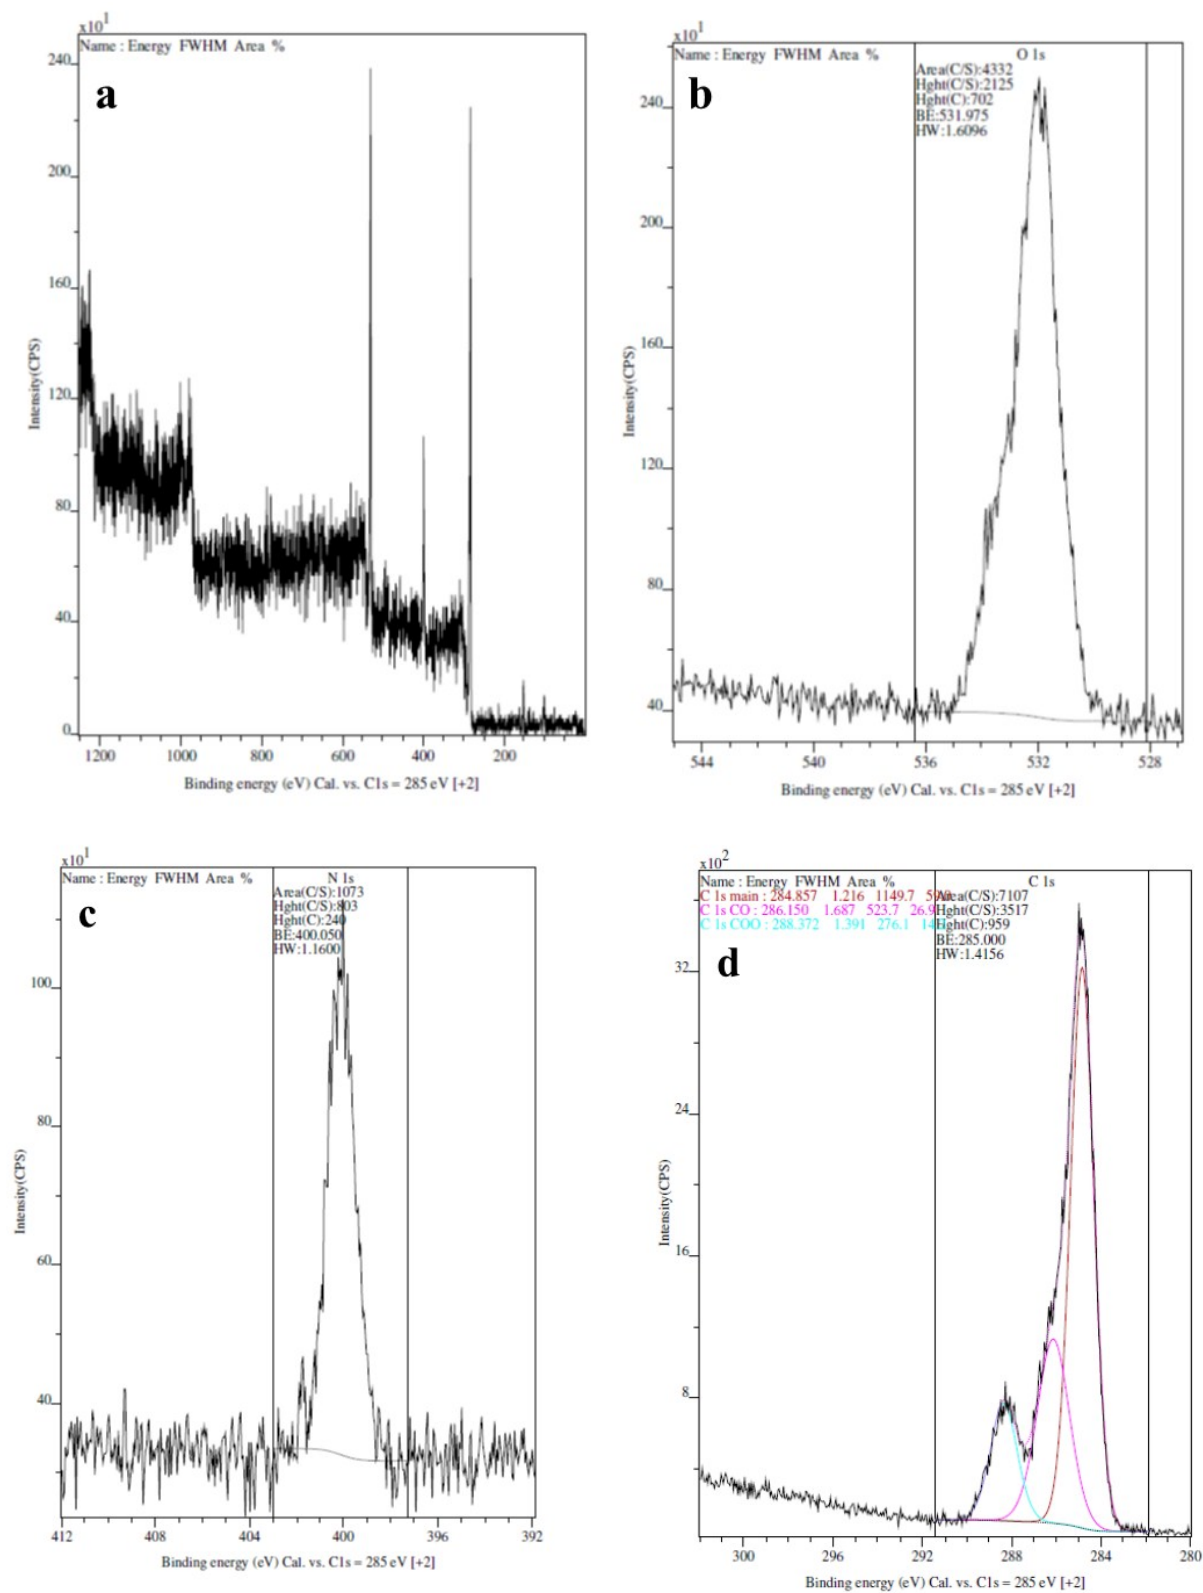

**Figure: S5.** XPS spectra of N@C-dots (a) full scan, (b) XPS of O, (c) N, and (d) C.

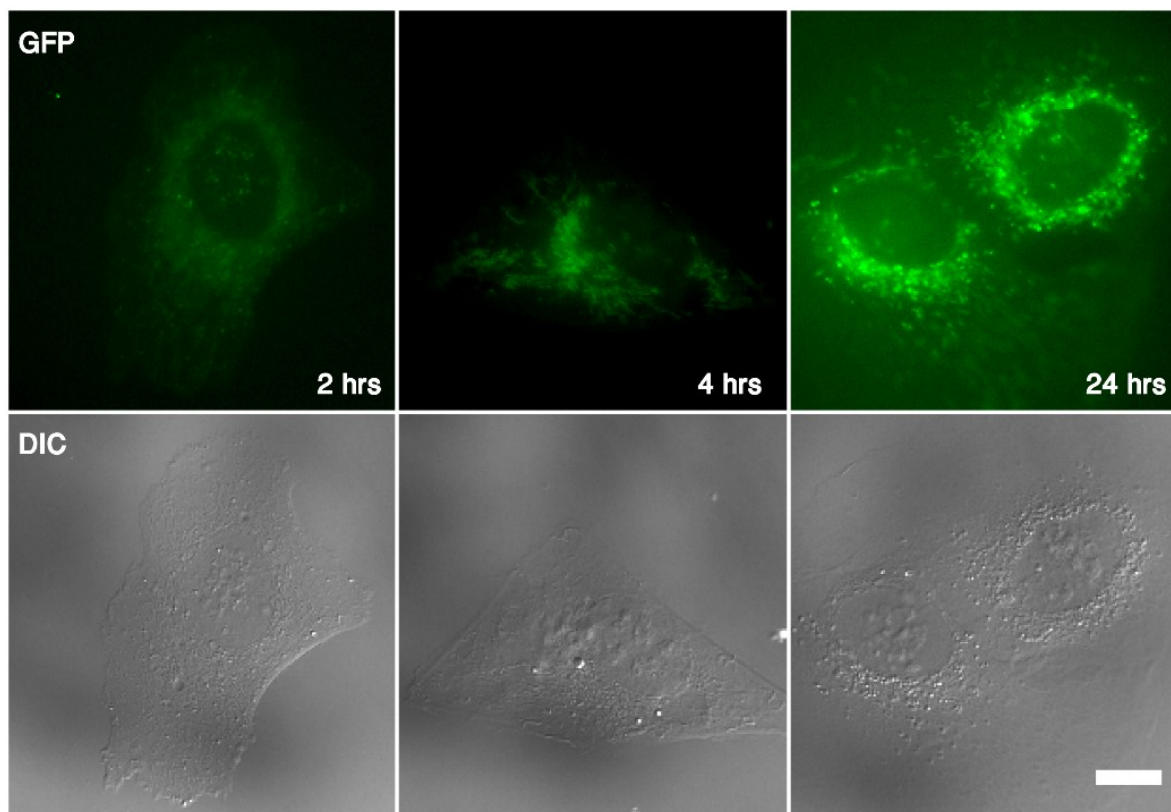

**Figure: S6.** Following BSA QD (N@C-dots) for a period of 24 hours in U2OS cells. All the GFP images were captured under identical conditions. The highest florescent signal is observed after 24 hours of treatment. Scale bar=15 $\mu$ m.

**Table S1:** Results of the elemental analysis by different spectroscopy techniques.

| Method                | Carbon (wt.%) | Oxygen<br>(wt.%) | Nitrogen (wt.%) | Hydrogen (wt.%) |
|-----------------------|---------------|------------------|-----------------|-----------------|
| XPS                   | 56.8          | 22               | 15.3            | ---             |
| EDS                   | 54            | 22               | 17              | ---             |
| CHNSO<br>chromatogram | 50.5          | 24.5             | 15.63           | 7.1             |
